# Supplementary material for: Polymorphism of amantadinium niflumate
Source: Royal Society of Chemistry journal article supplement (doi:10.1039/d3ce00754e), 2023-01-01
Supplement: d3ce00754e1.pdf [file d3ce00754e1.pdf]

## Supplementary Information

Polymorphism of amantadinium niflumate

*Marta S. Krawczyk*<sup>\*a</sup>, *Monika K. Krawczyk*<sup>b</sup> and *Irena Majerz*<sup>a</sup>

<sup>a</sup>Faculty of Pharmacy, Wrocław Medical University, Borowska 211a, Wrocław, 50-556,  
Poland

<sup>b</sup>Institute of Experimental Physics, University of Wrocław, M. Borna 9, 50-204, Wrocław,  
Poland

**Table S1 Selected bond lengths in polymorphs I and II.**

| Bond     | Bond length [Å] |              |
|----------|-----------------|--------------|
|          | polymorph I     | polymorph II |
| O1–C1    | 1.2632(17)      | 1.2652(15)   |
| O2–C1    | 1.2672(19)      | 1.2562(17)   |
| C1–C2    | 1.5033(19)      | 1.5084(17)   |
| C2–C3    | 1.423(2)        | 1.4272(17)   |
| C2–C7    | 1.387(2)        | 1.3864(18)   |
| C3–N1    | 1.3748(19)      | 1.3733(17)   |
| C3–N4    | 1.3415(19)      | 1.3408(16)   |
| N4–C5    | 1.341(2)        | 1.3401(18)   |
| C5–C6    | 1.381(2)        | 1.3800(18)   |
| C6–C7    | 1.390(2)        | 1.3871(18)   |
| N1–C8    | 1.4006(19)      | 1.3976(17)   |
| C8–C9    | 1.394(2)        | 1.3981(18)   |
| C8–C13   | 1.401(2)        | 1.4017(19)   |
| C9–C10   | 1.393(2)        | 1.3944(18)   |
| C10–C11  | 1.384(2)        | 1.389(2)     |
| C10–C14/ | 1.456(7)        | 1.4961(18)   |
| C10–C14I | 1.534(6)        |              |
| C11–C12  | 1.389(2)        | 1.3863(19)   |
| C12–C13  | 1.382(2)        | 1.3793(18)   |
| C14–F1/  | 1.305(5)        | 1.3400(16)   |
| C14I–F1I | 1.302(5)        |              |
| C14–F2/  | 1.299(4)        | 1.3368(16)   |
| C14I–F2I | 1.299(4)        |              |
| C14–F3/  | 1.309(6)        | 1.3293(18)   |
| C14I–F3I | 1.307(6)        |              |
| N3–C1A   | 1.5124(17)      | 1.5007(16)   |
| C1A–C7A  | 1.526(2)        | 1.5280(18)   |
| C1A–C2A  | 1.526(2)        | 1.5295(17)   |
| C1A–C6A  | 1.5329(18)      | 1.5314(17)   |
| C2A–C3A  | 1.5413(19)      | 1.5379(18)   |
| C3A–C4A  | 1.535(2)        | 1.5359(19)   |
| C3A–C9A  | 1.529(2)        | 1.533(2)     |
| C4A–C5A  | 1.531(2)        | 1.5330(19)   |
| C5A–C6A  | 1.540(2)        | 1.5359(18)   |
| C5A–C10A | 1.530(2)        | 1.529(2)     |
| C7A–C8A  | 1.5390(19)      | 1.5377(18)   |
| C8A–C9A  | 1.535(2)        | 1.5304(19)   |

C8A C10A 1.5327(19) 1.5345(19)

---

**Table S2 Selected angles in polymorphs I and II.**

---

| Angle                       | Angle value [°]      |              |
|-----------------------------|----------------------|--------------|
|                             | polymorph I          | polymorph II |
| O1–C1–O2                    | 123.29(13)           | 124.49(11)   |
| O1–C1–C2                    | 118.25(13)           | 116.43(11)   |
| O2–C1–C2                    | 118.43(12)           | 119.09(10)   |
| N1–C3–C2                    | 119.16(12)           | 118.69(11)   |
| N1–C3–N4                    | 118.50(13)           | 118.76(11)   |
| C3–N1–C8                    | 130.39(13)           | 130.64(11)   |
| C3–N4–C5                    | 117.97(12)           | 117.66(11)   |
| N1–C8–C9                    | 124.62(14)           | 124.79(12)   |
| N1–C8–C13                   | 116.41(13)           | 116.12(11)   |
| N4–C5–C6                    | 124.46(13)           | 124.61(11)   |
| C2–C7–C6                    | 120.89(13)           | 120.79(11)   |
| C8–C9–C10                   | 118.90(15)           | 118.89(12)   |
| C9–C10–C14/<br>C9–C10–C141  | 114.2(2)<br>119.7(3) | 120.19(12)   |
| C10–C14–F1/<br>C10–C141–F11 | 114.9(4)<br>112.9(4) | 112.44(11)   |
| C10–C14–F2/                 | 112.1(5)             | 112.39(11)   |

|                             |                      |            |
|-----------------------------|----------------------|------------|
| C10-C141-F21                | 114.7(4)             |            |
| C10-C14-F3/<br>C10-C141-F31 | 117.0(5)<br>109.5(5) | 113.92(11) |
| C11-C12-C13                 | 120.26(16)           | 120.42(12) |
| N3-C1A-C2A                  | 109.22(11)           | 109.02(10) |
| N3-C1A-C6A                  | 107.98(11)           | 108.81(10) |
| N3-C1A-C7A                  | 109.21(11)           | 109.01(10) |
| C1A-C2A-C3A                 | 108.59(12)           | 108.85(10) |

---

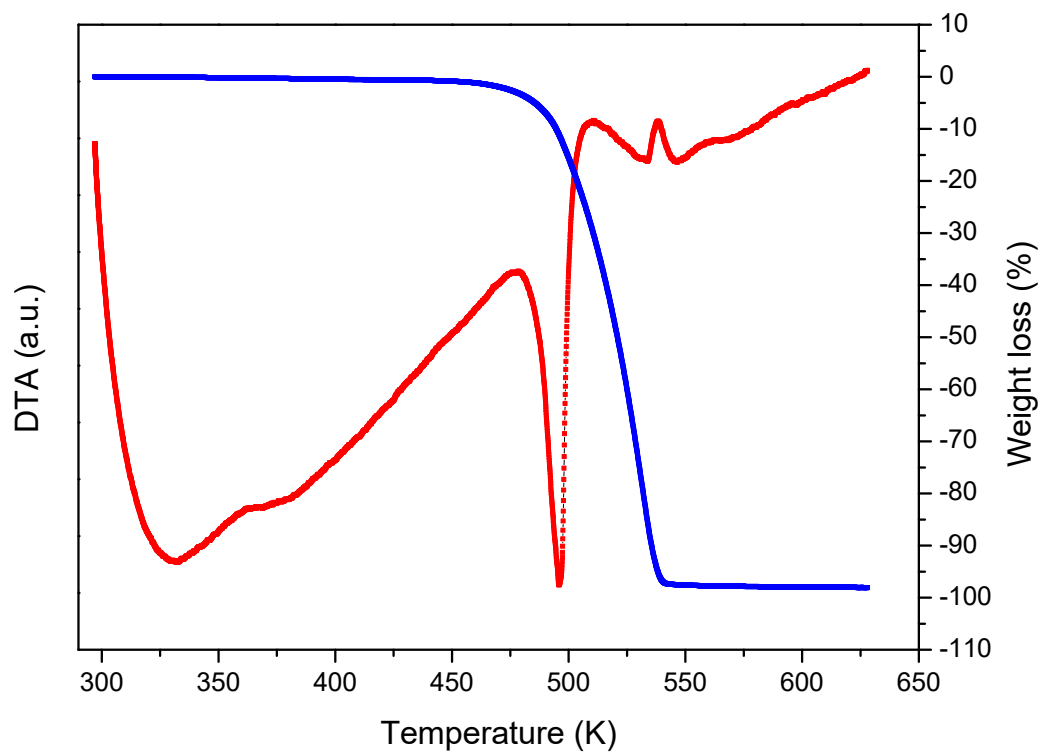

Figure S1. DTA (red) and DTG (blue) curves upon heating run for the polymorph **I**.

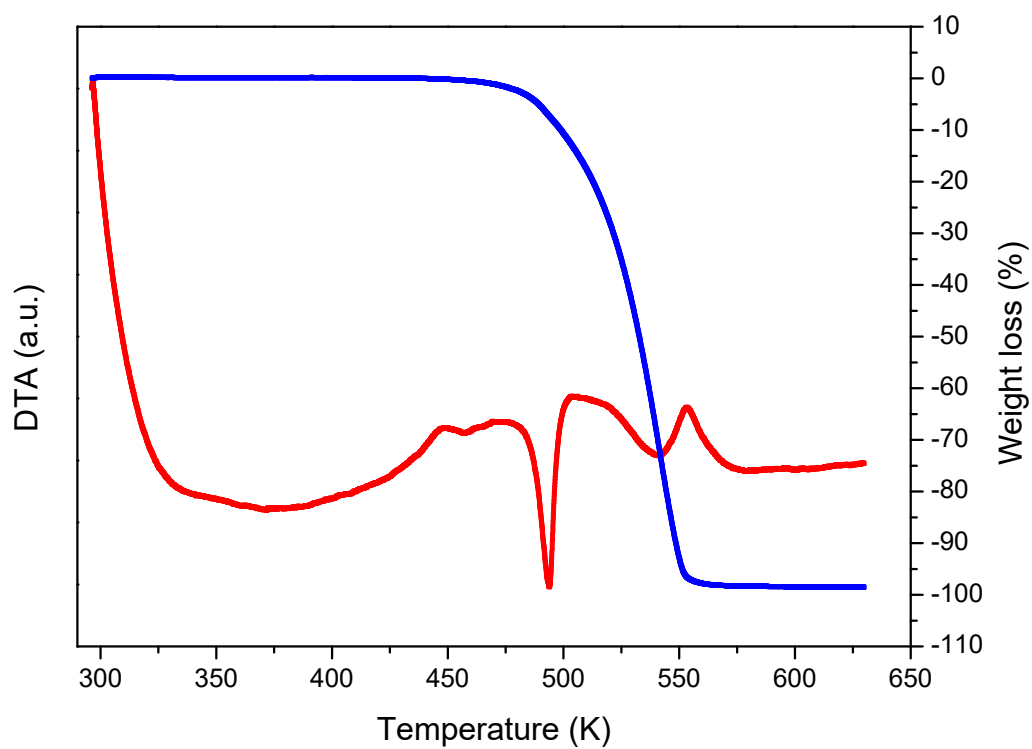

Figure S2. DTA (red) and DTG (blue) curves upon heating run for the polymorph **II**.

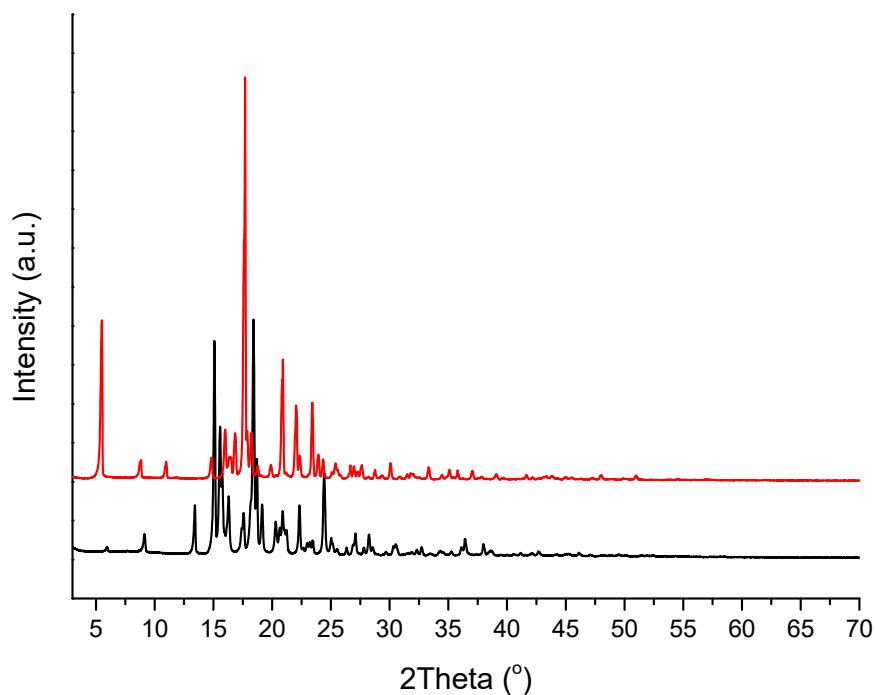

Figure S3. Comparison of diffractograms of polymorphs **I** (red curve) and **II** (black curve).

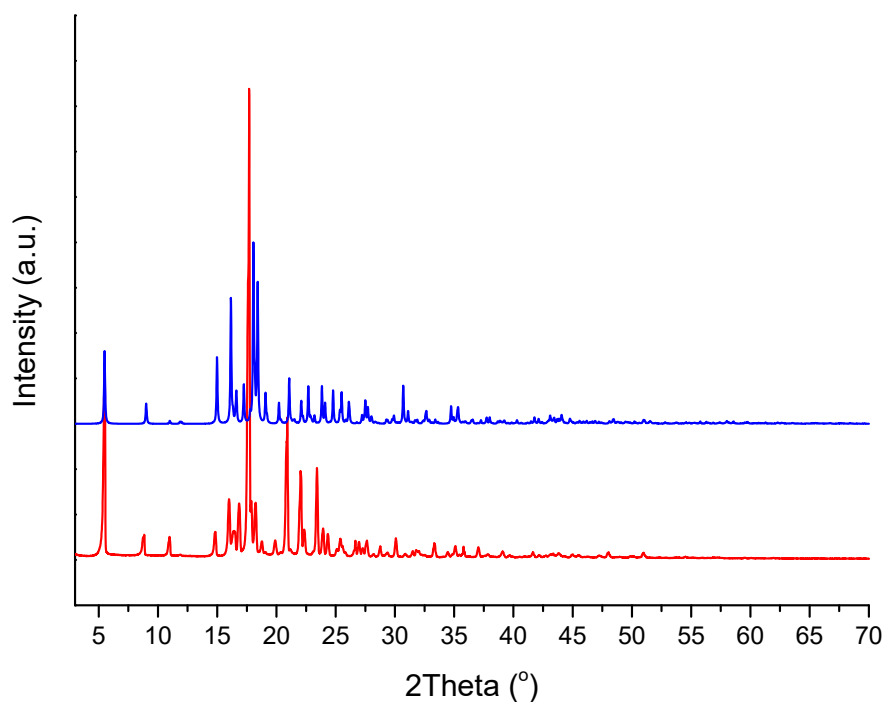

Figure S4. Comparison of diffractograms of polymorph **I**: simulated from single crystal X-ray diffraction (blue curve) and experimental (red curve).

Shifts in the positions ( $2\theta$ ) of the appropriate reflections in the simulated diffractograms relative to the experimental ones result from different measurement temperatures: XRPD at ambient temperature and single-crystal X-ray measurements at 100 K.

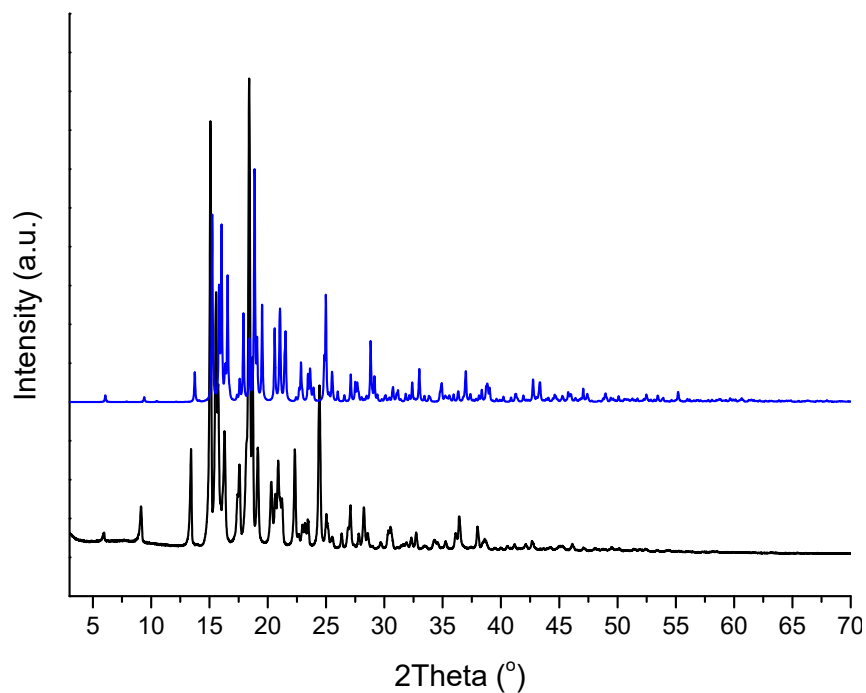

Figure S5. Comparison of diffractograms of polymorph **II**: simulated from single crystal X-ray diffraction (blue curve) and experimental (black curve).

Shifts in the positions ( $2\theta$ ) of the appropriate reflections in the simulated diffractograms relative to the experimental ones result from different measurement temperatures: XRPD at ambient temperature and single-crystal X-ray measurements at 100 K.

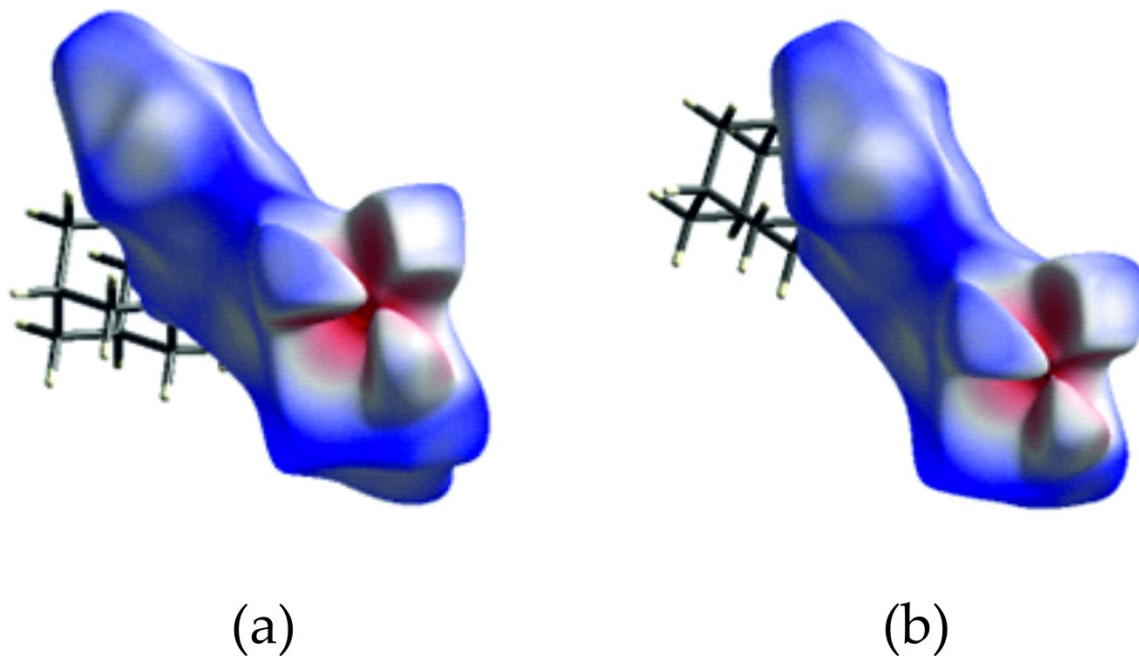

Figure S6. Hirshfeld surface plots of polymorphs **I** (a) and **II** (b) mapped with  $d_{norm}$ .

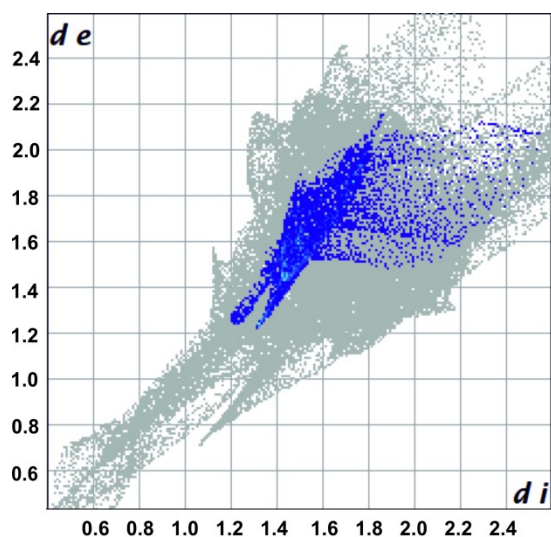

(a)

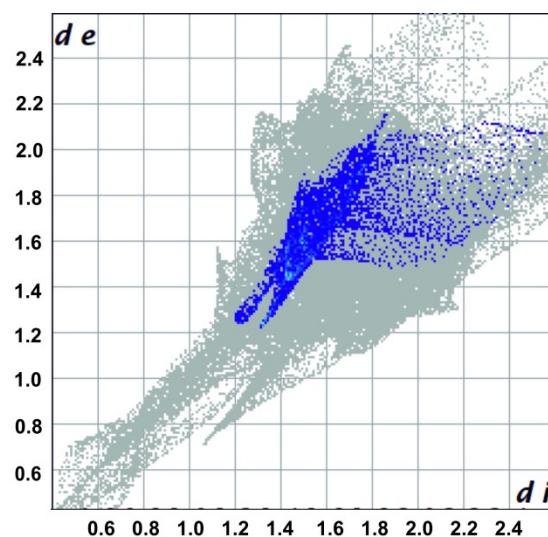

(b)

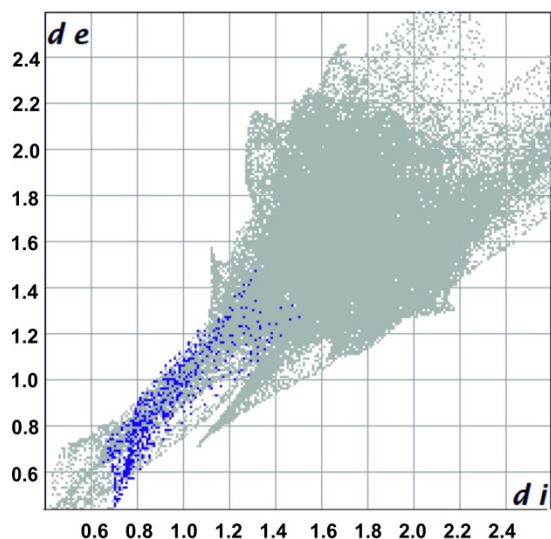

(c)

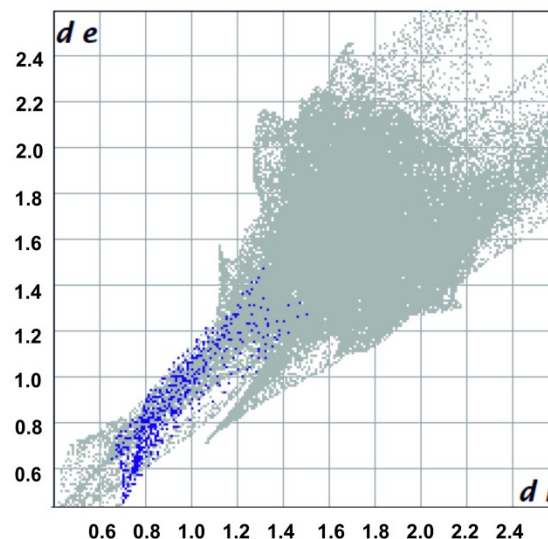

(d)

Figure S7. Fingerprint plots of polymorphs: **I** (a,c) and **II** (b,d), showing the contributions from (a, b) H $\cdots$ F interactions, (c, d) C $\cdots$ F interactions.

Hirshfeld surfaces and fingerprint plots (Fig S6, S7) for both polymorphs are prepared using CrystalExplorer software. It revealed that for the studied crystals the differences are very subtle and the program is not sufficient to present them.
